# Supplementary material
Source: publisher site journal article supplement (http://www.degruyter.com/publication/journal_key/SNDE/downloadAsset/SNDE_Increase%20Visibility%20to%20your%20Research.pdf)
Supplement: Supplementary file 1 [file SNDE_Increase%20Visibility%20to%20your%20Research.pdf]

## Increase the visibility to your research

De Gruyter has recently partnered with Code Ocean to improve the openness and transparency of the underlying code and data associated with articles. Through Code Ocean's widget, readers can not only access the code and data directly within the article, they can run the code without having to download anything to their local computer.

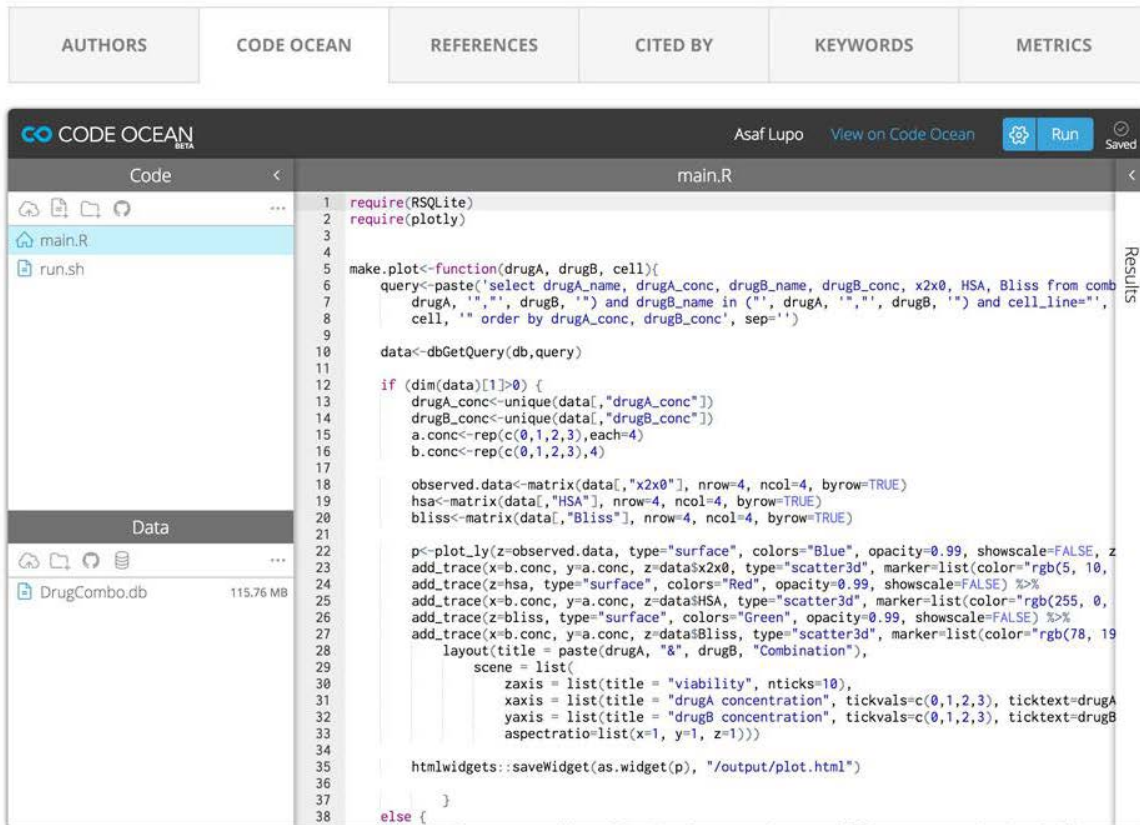

Sharing all research materials creates a more complete record of your research. Increase the visibility of your work by [uploading the code](#) associated to your published article so that readers can discover, view, and execute it in real-time.

Code Ocean is approved within our data policy and there are many benefits to using this free platform:

- Increase impact and credibility of your research.
- Get a DOI to gain credit when it is cited.
- Make it easier for you to build upon yours and others research code.
- Collaborate with colleagues using different programming languages.
- Save yourself future headaches by preserving your code on the web in its current state.

Once your code is published, it will be linked to your associated article in *Studies in Nonlinear Dynamics & Economics*. We encourage you to upload your code and data to Code Ocean and share it with your colleagues. [Sign up](#) for your free account today!
